# Supplementary material for: Social participation and the combination of future needs for long-term care and mortality among older Japanese people: a prospective cohort study from the Aichi Gerontological Evaluation Study (AGES)
Source: PubMed Central journal article supplement — BMJ Open. 2019 Nov 11;9(11):e030500. doi: 10.1136/bmjopen-2019-030500 (PMC6858158; doi:10.1136/bmjopen-2019-030500), 2019-11-11
Supplement: bmjopen-2019-030500supp001.pdf [file bmjopen-2019-030500supp001.pdf]

**Supplementary Table S1.** Baseline characteristics

|                          |                                   | Social participation | Non-participation | Total          |
|--------------------------|-----------------------------------|----------------------|-------------------|----------------|
| N (%)                    |                                   | 9,863 (73.6)         | 3,547 (26.5)      | 13,140         |
| Age, y                   | Average $\pm$ Standard deviation  | 72.5 $\pm$ 5.7       | 72.9 $\pm$ 6.3    | 72.6 $\pm$ 5.8 |
| Gender (%)               | Men                               | 4,902 (49.7)         | 1,696 (47.8)      | 6,598 (49.2)   |
| Social participation (%) | Local community                   | 7,613 (77.2)         | -                 | 7,613 (56.8)   |
|                          | Hobby groups                      | 4,045 (41.0)         | -                 | 4,045 (30.2)   |
|                          | Sports groups or clubs            | 2,671 (27.1)         | -                 | 2,671 (19.9)   |
|                          | Political organization or groups  | 1,029 (10.4)         | -                 | 1,029 (7.7)    |
|                          | Industrial or trade associations  | 1,298 (13.2)         | -                 | 1,298 (9.7)    |
|                          | Religious organizations or groups | 1,544 (15.7)         | -                 | 1,544 (11.5)   |
|                          | Volunteer groups                  | 1,330 (13.5)         | -                 | 1,330 (9.9)    |
|                          | Citizen or consumer groups        | 623 (6.3)            | -                 | 623 (4.7)      |
| Family status            | Living alone                      | 936 (9.5)            | 374 (10.5)        | 1,310 (9.8)    |
|                          | Missing                           | 0 (0.0)              | 0 (0.0)           | 0 (0.0)        |
| Educational attainment   | More than 9 years                 | 4,291 (43.5)         | 1,185 (33.4)      | 5,476 (40.8)   |
|                          | Missing                           | 77 (0.8)             | 46 (1.3)          | 123 (0.9)      |
| Smoking                  | Current smoker                    | 1,190 (12.1)         | 511 (14.4)        | 1,701 (12.7)   |
|                          | Missing                           | 291 (3.0)            | 171 (4.8)         | 462 (3.5)      |
| Alcohol                  | Current drinker                   | 2,161 (21.9)         | 638 (18.0)        | 2,799 (20.9)   |
|                          | Missing                           | 129 (1.3)            | 71 (2.0)          | 200 (1.5)      |
| Walking time             | More than 30 min/day              | 5,952 (60.4)         | 1,904 (53.7)      | 7,856 (58.6)   |
|                          | Missing                           | 890 (9.0)            | 403 (11.4)        | 1,293 (9.6)    |
| Household income         | More than 3,000,000 yen/year      | 5,389 (54.6)         | 1,488 (42.0)      | 6,877 (51.3)   |
|                          | Missing                           | 1,404 (14.2)         | 666 (18.8)        | 2,070 (15.4)   |
| Numbers of comorbidity   | One                               | 3,415 (34.6)         | 1,239 (34.9)      | 4,654 (34.7)   |
|                          | Two or more                       | 4,516 (45.8)         | 1,614 (45.5)      | 6,130 (45.7)   |
|                          | Missing                           | 0 (0.0)              | 0 (0.0)           | 0 (0.0)        |

**Supplementary Table S2.** Multinomial logistic regression analysis: Association between social participation and the incidence of the need for LTC and death at two and five years - Reference category: Without need for LTC

| Follow-up period           | Survival with need for LTC | Death             |
|----------------------------|----------------------------|-------------------|
| Two years (n = 10,019)     |                            |                   |
| No. of participants, n (%) | 136 (1.4)                  | 333 (3.3)         |
| Social participation (yes) |                            |                   |
| AOR (95% CI) <sup>a</sup>  | 0.45 (0.32-0.64)**         | 0.92 (0.71-1.18)  |
| Five years (n = 9,888)     |                            |                   |
| No. of participants, n (%) | 346 (3.5)                  | 1,047 (10.6)      |
| Social participation, yes  |                            |                   |
| AOR (95% CI) <sup>a</sup>  | 0.68 (0.54-0.86)**         | 0.83 (0.71-0.96)* |

\*: p<0.05, \*\*: p<0.01.

Note: LTC, long-term care; AOR, adjusted odds ratio; CI, confidence interval.

<sup>a</sup>Adjusted for age, gender, living alone, education, smoking, alcohol, household income, walking time, and number of comorbidities

**Supplementary Table S3.** Multinomial logistic regression analysis: Association between social participation and the incidence of the certification of Needed Support and death at 9.4 years (N = 9,741) - Reference category: Without the certification of Needed Support

| Variable                                        | Survival with the certification of Needed Support | Death              |
|-------------------------------------------------|---------------------------------------------------|--------------------|
|                                                 | AOR (95% CI)                                      | AOR (95% CI)       |
|                                                 | 1,263 (13.0)                                      | 1,758 (18.1)       |
| Social participation (yes)                      | 0.93 (0.81-1.07)                                  | 0.78 (0.69-0.89)** |
| Age (per 5 years)                               | 2.36 (2.23-2.50)**                                | 2.45 (2.45-2.72)** |
| Gender (men)                                    | 0.66 (0.57-0.75)**                                | 1.78 (1.57-2.01)** |
| Family (living alone)                           | 1.04 (0.85-1.28)                                  | 0.92 (0.74-1.13)   |
| Education (more than 9 years)                   | 0.99 (0.88-1.12)                                  | 0.95 (0.85-1.06)   |
| Smoking (yes)                                   | 1.45 (1.20-1.74)**                                | 1.82 (1.58-2.11)** |
| Alcohol (yes)                                   | 0.97 (0.82-1.14)                                  | 0.91 (0.80-1.04)   |
| Walking time (more than 30 min/day)             | 0.85 (0.75-0.96)*                                 | 0.72 (0.64-0.80)** |
| Household income (more than 3,000,000 yen/year) | 0.81(0.71-0.92)**                                 | 0.92 (0.82-1.03)   |
| One comorbidity                                 | 1.44 (1.21-1.73)**                                | 1.32 (1.13-1.55)** |
| Two or more comorbidities                       | 1.97 (1.66-2.34)**                                | 1.87 (1.61-2.17)** |

\*: p<0.05, \*\*: p<0.01.

Note: AOR, adjusted odds ratio; CI, confidence interval.
